# Supplementary material for: Status of financial toxicity and its influence on quality of life in patients with gynecological malignancies in China
Source: PeerJ journal article supplement (doi:10.7717/peerj.20560), 2026-01-15
Supplement: A_Codebook_of_Categorical_Data.docx [file A_Codebook_of_Categorical_Data.docx]

**A Codebook of Categorical Data**

**Age (years):** 1= 18 - 30; 2 = 31 - 44; 3= 45 - 60; 4 = ＞60

**Nationality:** 1= Han people; 2= Ethnic minorities

**Place of residence:** 1= City; 2= County/town; 3= Rural/suburban

**Marital status:** 1 = Married; 2 = Single; 3 = Divorced; 4=Widowed

**Occupation:** 1 = students; 2=Farmers/Fishermen; 3=Worker/Waiter; 4=Individual household; 5=Professional Technical/administrative Personnel; 6=temporary staff; 7=Retire; 8=Wait for employment; 9=Dimission

**The impact of illness on work:** 1=Have no effect; 2=Late retirement; 3=Early retirement; 4=Unemployment/resignation

**Educational Status:** 1=Never went to school; 2=Primary school; 3=Junior high school; 4=High school/technical secondary school; 5=Junior college; 6=Bachelor degree or above

**Number of children:** 0=none; 1=1;2=2;3=3;4=4.5=5;6=6

**Children's age (years)**: 1 = 0 - 6; 2 = 7 - 17; 3 = 18 - 24; 4 = ＞24

**Monthly per capita family income:** 1=≤¥1000; 2=¥1001-2999; 3=¥3000-4999; 4=≥¥5000

**Medical insurance:** 0=Self-financing; 1=Medical insurance for urban workers; 2=Medical insurance for urban and rural residents

**Commercial insurance:** 0=No; 1=Yes

**Receive subsidy:** 0=No; 1=Yes

**Endowment insurance:** 0=No; 1=Yes

**Caregiver:** 0= None; 1=Hubby; 2=Sons and daughters; 3=Parent; 4=Relatives and friends; 5=Others

**Medical treatment in different locations:** 0=No; 1=Yes

**How long it takes to get to the hospital:** 1=＜2 hours; 2=2-5 hours; 3=＞5 hours

**Treatment costs in the last 3 months:** 1=≤¥1000; 2=¥1001-299; 3=¥3000-4999; 4=≥¥5000

**Disease diagnosis:** 1=Cervical cancer; 2=Endometrial cancer; 3=Ovarian cancer

**Pathological stage**: 1=Stage I; 2=Stage II; 3=Stage III; 4=Stage IV

**Course of disease:** 1=＜3 months; 2=3-6 months; 3=6-12 months; 4=＞12 months

**Metastasis or not:** 0=No; 1=Yes

**Relapse or not:** 0=No; 1=Yes

**Complicated chronic disease:** 0=None; 1=1; 2=2

**Mode of operation:** 0 = No; 1 = Laparotomy; 2 = Laparoscopic surgery

**Chemotherapy:** 0= No; 1=Yes

**Radiotherapy:** 0= No; 1=Yes

**Biological immunotherapy:** 0= No; 1=Yes

**Molecular targeted therapy:** 0= No; 1=Yes

**TCM (traditional Chinese medicine) therapy:** 0= No; 1=Yes

**Supportive treatment:** 0= No; 1=Yes

**Hospitalizations:** 1=1-2; 2=3-5; 3=6-10; 4=≥10

**Complication:** 0= No; 1=Yes
