# Supplementary material for: Status of financial toxicity and its influence on quality of life in patients with gynecological malignancies in China
Source: PeerJ journal article supplement (doi:10.7717/peerj.20560), 2026-01-15
Supplement: Raw_data.xlsx [file Raw_data.xlsx]

## Sheet: Sheet1
NO.	Age (years)	Nationality	Place of residence	Marital status	Occupation	The impact of illness on work	Educational Status	Number of children	Children's age (years)	Monthly per capita family income	Medical insurance	Commercial insurance	Receive subsidy	Endowment insurance	Caregiver	Medical treatment in different locations	How long it takes to get to the hospital	Treatment costs in the last 3 months	Disease diagnosis	Pathological stage	Course of disease	Metastasis or not	Relapse or not	Complicated chronic disease	Mode of operation	chemotherapy	radiotherapy	Biological immunotherapy	Molecular targeted therapy	TCM (traditional Chinese medicine) therapy	Supportive treatment	hospitalizations	Complication	COST total score	COST grade	Financial expenditure	Financial resources	Financial effect	COST-1	COST-2	COST-3	COST-4	COST-5	COST-6	COST-7	COST-8	COST-9	COST-10	COST-11
1	54	1	1	1	7	1	3	0	/	3	2	0	0	1	1	0		4	2	1	1	0	0	0	2	1	0	0	0	0	0	2	1	22	1	3	3	16	1	3	3	0	4	1	2	3	4	0	1
2	55	1	2	1	7	1	2	2	16	2	2	0	0	0	4	0		3	1	3	1	0	0	0	0	1	0	0	0	0	0	2	1	15	1	2	3	10	2	2	1	1	2	2	1	1	1	1	1
3	61	1	1	3	7	1	4	1	36	3	1	0	0	1	4	0		4	2	3	2	0	0	0	2	1	0	0	0	0	0	3	1	17	1	1	2	14	1	1	2	2	3	2	1	1	2	2	1
4	53	1	2	1	7	1	3	3	31	2	2	0	1	1	1	0		4	1	2	1	0	0	0	1	1	0	0	0	0	0	1	0	23	1	3	3	17	1	3	3	3	3	1	2	1	2	2	2
5	43	1	1	1	5	1	6	1	17	3	2	0	1	1	5	0		4	3	3	2	0	0	0	1	1	0	0	0	0	0	2	0	15	1	2	3	10	2	2	2	1	2	0	1	1	2	1	1
6	61	1	3	1	2	1	2	1	40	1	2	0	0	0	1	0		4	3	3	1	0	0	0	2	1	0	0	0	0	0	2	1	16	1	3	2	11	1	3	1	2	1	0	1	1	1	3	2
7	69	1	2	1	7	1	2	3	46	2	0	0	0	0	4	1	1	4	1	1	1	0	0	1	1	1	0	0	0	0	0	1	0	17	1	1	2	14	1	1	2	1	2	1	1	1	3	3	1
8	43	1	3	1	5	1	6	1	21	3	1	0	0	1	1	0		4	1	2	1	0	0	0	2	1	0	0	0	0	0	1	0	25	1	3	5	17	2	3	1	2	2	2	3	3	3	2	2
9	42	1	3	1	3	4	3	1	20	2	2	0	0	0	1	0		4	3	2	2	0	0	0	1	1	0	0	0	0	0	2	1	16	1	1	2	13	1	1	1	2	3	1	1	1	3	3	1
10	51	1	3	1	7	1	3	1	24	2	2	0	0	0	2	0		4	3	2	1	0	0	0	1	1	0	0	0	0	0	2	0	18	1	2	2	14	1	2	2	1	2	1	1	2	3	2	1
11	40	1	2	1	8	1	4	1	13	2	2	0	0	1	4	0		4	1	2	1	1	0	0	2	1	1	0	0	0	0	2	1	23	1	2	3	18	2	2	3	3	2	1	1	2	3	3	1
12	73	1	3	1	7	1	4	1	41	2	1	0	1	1	2	0		4	2	1	1	0	0	1	2	0	1	0	0	0	0	2	0	15	1	2	2	11	1	2	2	2	1	1	1	1	1	2	1
13	49	1	2	1	3	4	2	1	25	2	1	0	0	1	1	0		4	1	3	3	0	0	0	2	1	0	0	0	0	0	3	1	11	2	1	2	8	1	1	2	1	1	0	1	1	1	1	1
14	67	1	3	1	7	1	4	1	40	2	2	0	0	1	1	0		4	3	3	4	1	1	1	1	1	0	0	0	0	0	4	1	18	1	2	2	14	1	2	2	3	1	1	1	1	2	3	1
15	63	1	3	1	7	1	4	1	39	2	2	0	0	1	1	0		4	2	1	1	0	0	1	2	1	0	0	0	0	0	1	0	13	2	1	3	9	2	1	1	1	2	1	1	1	1	1	1
16	62	1	2	1	7	1	4	1	37	2	2	0	0	1	1	0		4	1	1	1	0	0	1	2	1	0	0	0	0	0	2	0	12	2	1	3	8	2	1	1	1	1	1	1	1	1	1	1
17	45	1	3	4	4	1	2	2	28	2	2	0	0	0	2	0		4	3	2	1	0	0	0	1	0	0	0	0	0	0	1	0	8	2	3	0	5	0	3	0	2	2	1	0	0	0	0	0
18	43	1	3	3	3	1	4	1	20	3	0	0	0	0	2	1		4	1	3	4	1	1	0	1	1	0	0	0	0	0	4	1	32	0	3	4	25	2	3	3	4	3	2	2	3	4	4	2
19	54	1	3	1	2	1	2	1	25	2	2	0	0	1	1	0		4	1	2	1	0	0	1	1	0	0	0	0	0	0	1	0	24	1	3	2	19	1	3	3	3	2	1	1	3	3	3	1
20	53	1	2	1	2	1	2	2	33	4	2	0	0	0	5	0		4	2	2	1	0	0	0	1	0	0	0	0	0	0	1	0	40	0	4	8	28	4	4	4	4	4	0	4	4	4	4	4
21	50	1	3	1	3	1	3	1	30	2	2	0	0	1	1	0		4	3	4	4	1	1	1	1	1	0	0	0	0	0	4	1	15	1	2	2	11	0	2	1	1	1	1	2	2	2	1	2
22	52	1	3	1	3	4	3	2	27	3	0	0	0	0	2	1	2	4	1	3	3	1	1	0	1	1	1	1	0	0	0	4	1	4	2	0	0	4	0	0	0	4	0	0	0	0	0	0
23	48	1	2	1	3	1	3	1	24	2	2	0	1	1	2	0		4	1	3	1	1	0	0	1	1	1	0	0	0	0	2	0	4	2	0	2	2	2	0	0	1	1	0	0	0	0	0	0
24	38	1	2	1	4	1	2	1	14	3	2	0	0	1	1	0		4	3	3	2	1	0	0	1	1	0	0	0	0	0	2	1	21	1	0	2	19	1	0	3	3	3	0	1	3	3	3	1
25	57	1	3	1	3	4	3	2	26	1	0	0	0	0	1	1	1	4	3	2	2	1	0	0	1	1	0	0	0	0	0	2	0	23	1	3	0	20	0	3	3	3	3	2	0	3	2	3	1
26	53	1	1	1	7	1	3	1	26	2	2	0	0	1	1	0	1	4	3	3	4	1	1	1	1	1	0	0	0	0	0	3	1	21	1	3	2	16	1	3	1	4	3	0	1	3	4	1	0
27	54	1	3	1	3	4	3	1	30	2	0	0	0	0	1	1		4	3	4	4	1	1	0	1	1	0	0	0	0	0	4	1	4	2	0	0	4	0	0	0	4	0	0	0	0	0	0	0
28	29	1	1	2	8	4	1	0		2	2	0	0	1	3	0		4	3	4	4	1	1	1	1	1	0	0	0	0	0	4	1	4	2	0	0	4	0	0	0	0	1	0	0	0	1	1	1
29	56	1	2	1	3	4	3	2	33	2	2	0	0	0	1	0		4	2	4	1	1	0	0	0	1	1	0	1	0	0	3	1	20	1	3	1	16	1	3	3	3	1	0	0	4	4	1	0
30	63	1	1	3	7	1	4	1	35	3	2	0	0	1	2	0		4	3	2	1	1	0	0	1	1	0	0	0	0	0	2	0	23	1	3	2	18	1	3	2	2	3	2	1	2	3	3	1
31	55	1	3	1	2	1	2	0		1	2	0	0	0	1	0		3	3	3	4	1	1	0	0	1	0	0	0	0	0	4	1	2	2	0	0	2	0	0	0	1	1	0	0	0	0	0	0
32	37	1	1	1	8	1	4	1	15	3	2	0	0	0	1	0		4	2	2	1	0	0	1	1	0	0	0	0	0	0	1	0	14	1	2	2	10	1	2	2	1	2	0	1	1	2	2	0
33	44	1	2	1	8	4	3	2	21	2	0	0	0	1	1	0		4	1	3	1	0	0	0	1	0	0	0	0	0	0	1	0	20	1	2	2	16	2	2	2	1	1	1	0	3	4	4	0
34	57	1	2	1	3	4	3	1	33	4	2	0	0	0	1	0		4	3	3	1	1	0	1	1	1	0	0	0	0	0	2	0	19	1	3	2	14	2	3	2	2	1	1	0	3	2	2	1
35	58	1	3	1	7	1	1	2	36	3	2	0	0	0	2	0		3	3	3	1	1	0	0	0	1	0	0	0	0	0	1	0	3	2	0	1	2	0	0	0	0	0	0	1	1	0	1	0
36	45	1	2	1	5	1	4	2	25	3	2	0	1	0	1	0		4	1	2	2	1	0	0	1	1	0	0	0	0	0	1	0	17	1	3	1	13	0	3	1	4	1	0	1	3	3	1	0
37	52	1	1	4	7	1	2	1	25	1	1	0	0	1	5	0		4	1	4	2	0	0	0	1	1	1	0	0	0	1	3	1	18	1	2	2	14	1	2	2	2	2	0	1	2	3	2	1
38	52	1	1	1	7	1	2	1	30	3	1	0	0	0	1	0		4	1	4	3	0	0	0	2	1	1	1	1	1	0	4	1	19	1	2	3	14	2	2	2	2	2	1	1	2	2	2	1
39	47	1	2	1	5	1	5	1	22	4	1	0	0	1	1	0		4	3	3	4	1	1	0	1	1	0	0	1	1	0	4	1	22	1	2	3	17	2	2	2	2	1	2	1	3	3	2	2
40	50	1	3	1	3	4	3	1	23	3	2	0	0	0	1	0		4	2	3	1	0	0	0	1	0	0	0	0	0	0	1	0	25	1	2	3	20	2	2	3	4	3	1	1	2	2	3	2
41	73	1	1	1	7	1	3	2	47	4	1	0	0	1	2	0		4	3	4	4	1	1	1	1	1	0	0	0	0	0	4	1	26	0	1	4	21	2	1	1	4	4	2	2	2	4	2	2
42	56	2	1	1	7	1	3	2	26	4	1	0	1	1	2	0		4	1	1	1	0	0	0	2	0	0	0	0	0	0	1	0	37	0	4	5	28	2	4	4	4	1	3	3	4	4	4	4
43	60	1	1	1	7	1	1	2	36	4	1	0	0	1	1	0		3	3	2	1	0	0	0	0	1	0	0	0	0	0	1	0	26	0	4	3	19	2	4	3	1	3	1	1	3	4	3	1
44	62	1	1	1	7	1	4	1	35	4	1	0	0	1	2	0		4	1	1	1	0	0	1	1	0	0	0	0	0	0	1	0	25	1	3	3	19	1	3	3	3	2	1	2	3	3	3	1
45	52	1	1	3	5	1	5	1	25	2	0	0	0	1	2	0		4	1	2	1	0	0	1	1	0	0	0	0	0	0	1	0	22	1	3	4	15	2	3	2	3	2	2	2	2	1	2	1
46	42	1	1	1	5	1	6	1	18	4	1	0	0	1	1	0		4	2	2	1	0	0	0	1	1	0	0	0	0	0	2	0	27	0	2	4	21	2	2	3	3	3	1	2	3	4	3	1
47	33	1	2	1	8	1	3	2	1	4	2	0	0	1	1	0		4	3	3	1	0	0	0	1	0	0	0	0	0	0	1	0	26	0	2	4	20	2	2	3	2	4	1	2	3	2	3	2
48	58	1	2	1	7	1	3	1	31	2	2	1	0	1	1	0		4	2	2	1	0	0	0	1	0	0	0	0	0	0	1	0	23	1	2	2	19	1	2	2	2	3	2	1	3	3	3	1
49	33	1	2	1	5	1	6	0		4	1	0	0	1	3	0		4	3	3	1	1	0	0	1	1	0	0	0	0	0	1	0	30	0	3	3	24	2	3	3	3	3	2	1	3	4	4	2
50	51	1	3	1	3	4	2	1	31	2	0	0	0	0	1	1	1	4	3	3	1	1	0	0	1	1	0	0	0	0	0	2	0	0	3	0	0	0	0	0	0	0	0	0	0	0	0	0	0
51	56	1	3	1	7	1	3	2	27	4	2	1	0	0	2	0		4	2	2	3	1	0	1	1	1	0	0	0	0	0	3	1	27	0	3	3	21	1	3	2	2	3	2	2	3	3	3	3
52	33	1	3	3	8	4	3	1	13	2	2	0	0	1	3	0		4	1	2	1	0	0	0	1	0	0	0	0	0	0	1	0	6	2	3	0	3	0	3	0	2	1	0	0	0	0	0	0
53	34	1	1	3	5	1	4	1	11	4	2	0	0	1	1	0		4	1	1	1	0	0	0	1	0	0	0	0	0	0	1	0	26	0	3	3	20	2	3	3	3	3	1	1	3	3	3	1
54	58	1	1	1	7	1	3	2	35	2	2	0	0	1	2	0		4	1	4	3	1	0	0	0	1	1	0	0	0	0	3	1	26	0	3	2	21	1	3	3	3	3	1	1	3	3	3	2
55	55	1	2	1	3	4	3	1	35	4	2	0	0	0	1	0		4	2	3	4	1	1	0	2	1	0	0	0	0	0	4	1	13	2	1	2	10	1	1	1	4	3	0	1	1	0	1	0
56	57	1	3	1	3	4	3	2	31	1	0	0	0	0	1	1	1	4	1	3	4	1	1	0	2	1	1	0	0	0	0	4	1	23	1	3	2	18	1	3	3	3	3	1	1	3	2	3	0
57	60	1	3	1	3	4	2	2	39	1	2	0	0	0	2	0		4	3	2	1	1	0	0	0	1	0	0	0	0	0	1	0	5	2	0	1	4	1	0	0	4	0	0	0	0	0	0	0
58	70	1	1	1	7	1	3	2	40	4	2	0	1	1	1	0		4	3	3	4	1	1	1	1	1	0	0	0	0	0	4	1	23	1	2	3	18	2	2	2	2	2	1	1	3	3	3	2
59	56	1	2	1	7	1	3	1	32	4	1	0	0	1	1	0		4	3	3	4	1	1	0	1	1	0	0	0	0	0	4	1	13	2	1	2	10	1	1	1	1	2	1	1	1	2	1	1
60	53	1	2	1	3	4	3	1	32	3	0	0	0	0	2	0	2	4	3	3	4	1	1	1	1	1	0	0	0	0	0	4	1	24	1	3	2	19	1	3	3	3	3	0	1	3	3	3	1
61	62	1	1	1	7	1	4	2	37	2	2	0	0	1	1	0		4	2	2	2	1	0	2	1	1	0	0	0	0	0	2	0	24	1	3	2	19	1	3	3	3	3	0	1	3	4	3	0
62	32	1	2	1	3	4	3	2	5	3	0	0	0	0	1	1	2	4	1	3	1	0	0	0	1	0	0	0	0	0	0	1	0	15	1	2	3	10	1	2	2	2	2	0	2	1	1	2	0
63	46	1	1	1	8	1	5	2	12	3	1	0	0	1	1	0	/	4	1	1	1	0	0	0	2	0	0	0	0	0	0	1	0	33	0	3	5	25	3	3	4	3	4	3	2	3	2	3	3
64	67	1	1	1	8	1	1	2	40	2	2	0	0	1	1	0	/	2	2	1	1	0	0	2	2	0	0	0	0	0	0	1	0	14	1	2	2	10	1	2	1	1	2	1	1	2	1	1	1
65	34	1	1	1	3	1	5	1	12	3	1	0	0	1	1	0	/	4	1	1	1	0	0	0	2	0	0	0	0	0	0	1	0	21	1	2	4	15	2	2	2	3	1	2	2	2	1	2	2
66	55	1	2	1	7	1	3	1	32	2	2	0	0	1	1	1	2	4	1	1	1	0	0	0	1	0	0	0	0	0	0	1	0	11	2	1	2	8	1	1	1	1	2	1	1	0	1	1	1
67	52	1	1	1	9	4	3	1	30	2	2	0	0	1	1	0		4	1	3	2	1	0	0	1	1	1	0	0	0	0	3	1	15	1	1	5	9	2	1	1	1	2	1	3	1	1	1	1
68	41	1	1	1	5	1	6	1	15	4	1	0	0	1	1	0	/	4	1	1	1	0	0	0	2	0	0	0	0	0	0	1	0	18	1	2	3	13	2	2	3	2	1	2	1	1	1	2	1
69	41	1	1	1	8	4	4	1	24	4	2	0	0	1	1	1	1	4	1	1	1	0	0	1	1	0	0	0	0	0	0	1	0	22	1	2	3	17	2	2	1	2	3	2	1	2	3	2	2
70	55	1	3	1	2	4	1	2	32	3	2	0	0	1	1	1	2	4	1	2	1	0	0	0	1	1	0	0	0	0	0	2	0	19	1	2	2	15	1	2	2	3	1	1	1	2	2	3	1
71	44	1	3	1	5	1	3	1	23	3	2	0	0	1	1	1	2	4	3	1	1	0	0	0	1	1	0	0	0	0	0	2	0	24	1	3	5	16	3	3	1	3	1	2	2	2	1	3	3
72	49	1	3	1	5	1	2	1	23	4	1	0	0	1	1	0		3	2	3	1	0	0	0	2	1	0	0	0	0	0	2	0	18	1	3	4	11	2	3	2	2	1	1	2	1	1	2	1
73	60	1	3	1	7	1	2	1	37	3	2	0	0	0	1	0		4	1	3	1	0	0	2	2	1	0	0	0	0	0	2	1	21	1	3	4	14	2	3	2	3	1	1	2	1	1	3	2
74	50	1	3	1	9	4	4	2	23	2	2	0	0	0	1	1	2	4	2	3	1	1	0	1	2	1	1	0	1	0	0	2	1	7	2	1	2	4	1	1	0	1	0	0	1	1	0	1	1
75	40	1	3	1	2	3	2	2	14	2	2	0	0	0	1	1	2	4	1	1	1	0	0	0	1	1	0	0	0	0	0	2	0	4	2	0	0	4	0	0	0	4	0	0	0	0	0	0	0
76	30	1	3	1	8	1	4	2	3	3	2	0	0	0	3	0		4	1	1	1	0	0	0	1	1	0	0	0	0	0	2	0	19	1	2	1	16	1	2	2	2	3	2	0	1	2	2	2
77	59	1	1	1	5	1	5	1	29	4	2	0	0	1	2	0		4	2	1	2	0	0	0	2	1	1	0	0	0	0	2	0	40	0	4	6	30	3	4	4	4	4	3	3	4	4	4	3
78	59	1	2	1	7	1	4	1	35	3	1	0	0	1	2	1	2	4	1	2	1	0	0	0	2	1	0	0	0	0	0	2	0	21	1	3	3	15	1	3	1	1	2	2	2	2	3	3	1
79	43	1	2	1	4	4	4	2	16	3	1	0	0	1	2	0		4	1	3	1	1	0	0	1	1	0	0	0	0	0	2	0	22	1	3	2	17	1	3	3	3	3	0	1	3	1	3	1
80	50	1	3	1	9	4	2	2	24	4	2	0	0	0	1	1	2	4	2	3	2	1	0	1	2	1	1	0	0	0	0	3	1	12	2	1	2	9	1	1	1	1	1	1	1	1	1	2	1
81	34	1	1	1	3	1	5	1	13	3	1	1	1	1	3	0		4	1	2	1	0	0	0	1	1	1	0	0	0	0	2	0	23	1	2	2	19	1	2	3	3	3	1	1	3	2	3	1
82	56	1	3	1	2	4	2	2	18	3	2	0	0	0	1	1	2	4	1	1	1	0	0	1	1	1	0	0	0	0	0	2	1	13	2	4	4	5	0	4	0	0	0	4	4	0	0	0	1
83	53	1	1	1	4	1	2	1	31	4	2	0	1	1	1	0		4	3	3	1	1	0	0	2	1	0	0	0	0	0	2	0	24	1	3	4	17	2	3	2	2	3	1	2	3	2	2	2
84	53	1	1	1	7	1	6	1	24	4	1	0	1	1	2	0		4	1	3	2	1	0	0	1	1	1	0	0	0	0	3	1	29	0	3	4	22	2	3	3	2	3	2	2	3	4	3	2
85	38	1	1	1	3	4	6	1	7	4	1	0	0	1	1	0		4	2	1	1	0	0	0	2	0	0	0	0	0	0	1	0	20	1	3	2	15	1	3	3	4	3	0	1	2	1	1	1
86	42	1	1	1	8	1	5	1	16	4	2	0	0	1	1	0		4	1	1	1	0	0	0	2	0	0	0	0	0	0	1	0	29	0	2	3	24	1	2	4	4	2	4	2	3	4	3	0
87	67	1	1	1	7	1	2	1	38	4	1	0	0	1	2	1	2	4	2	2	1	0	0	0	2	0	0	0	0	0	0	1	0	25	1	3	2	20	1	3	2	3	3	1	1	2	4	4	1
88	58	1	1	1	7	4	3	2	30	3	2	0	0	0	1	0		3	1	1	2	0	0	0	1	1	1	0	0	0	0	3	1	17	1	2	3	12	2	2	1	2	1	1	1	1	2	3	1
89	64	1	1	1	7	1	3	1	42	3	1	0	0	1	2	0		4	1	1	1	0	0	0	2	0	0	0	0	0	0	1	0	36	0	3	5	28	2	3	4	3	3	3	3	4	4	4	3
90	60	1	3	1	7	1	3	1	37	3	2	0	0	1	1	0		4	1	3	1	0	0	2	2	1	0	0	0	0	0	2	0	19	1	1	4	14	2	1	2	2	1	1	2	2	2	3	1
91	43	1	2	1	3	4	4	1	21	4	1	0	0	1	1	0		4	1	1	1	0	0	0	1	1	1	0	0	0	0	3	1	24	1	3	2	19	1	3	3	3	3	1	1	3	3	3	0
92	34	1	1	1	3	4	5	1	13	3	1	0	0	1	4	0		4	1	2	1	0	0	0	1	1	1	0	0	0	0	3	1	26	0	3	3	20	2	3	2	2	2	1	1	3	3	3	4
93	43	1	3	1	2	4	3	1	20	1	2	0	1	0	1	1	1	4	1	3	2	0	0	0	1	1	1	0	0	0	0	3	1	21	1	3	0	18	0	3	2	4	3	0	0	2	3	2	2
94	57	1	3	1	2	1	3	2	32	3	2	0	0	1	1	0		4	2	1	1	0	0	2	2	0	0	0	0	0	0	1	1	11	2	3	0	8	0	3	2	2	1	0	0	0	1	2	0
95	60	1	2	1	7	1	4	4	17	4	2	0	0	1	2	1	2	4	1	1	1	0	0	0	1	0	0	0	0	0	0	1	1	24	1	2	3	19	2	2	3	3	2	1	1	3	3	3	1
96	43	1	1	1	4	4	5	1	20	4	1	0	0	1	1	0		4	1	1	1	0	0	0	1	1	0	0	0	0	0	2	0	23	1	3	3	17	1	3	3	3	3	0	2	2	1	3	2
97	58	1	2	1	4	3	2	1	30	4	2	0	0	0	2	1	2	4	1	2	1	0	0	0	1	0	0	0	0	0	0	1	0	32	0	3	2	27	1	3	4	4	4	1	1	4	4	4	2
98	21	1	2	1	4	4	6	0		4	1	0	0	1	1	1	2	4	3	2	1	0	0	0	1	0	0	0	0	0	0	1	0	13	2	2	2	9	1	2	1	1	1	1	1	1	1	2	1
99	61	1	2	1	7	1	1	2	32	3	2	0	0	1	2	0		4	1	2	1	0	0	1	2	0	0	0	0	0	0	1	0	23	1	2	2	19	1	2	3	3	4	0	1	2	3	3	1
100	53	1	1	1	2	4	2	1	27	3	2	0	0	1	1	0		4	3	3	1	1	0	0	2	1	0	0	0	0	0	3	1	7	2	0	1	6	0	0	1	1	1	1	1	0	0	1	1
101	63	1	3	1	2	1	4	1	38	4	2	0	0	1	2	1	2	4	1	1	1	0	0	0	1	0	0	0	0	0	0	1	0	26	0	3	4	19	2	3	3	2	3	2	2	2	3	3	1
102	45	1	3	1	4	1	3	1	26	4	2	0	0	1	1	1	2	4	1	1	1	0	0	0	1	1	0	0	0	0	0	2	0	7	2	1	1	5	1	1	0	1	0	0	0	0	4	0	0
103	42	1	3	1	9	4	2	1	20	2	2	0	0	0	1	1	2	4	3	3	1	1	0	0	1	1	0	0	0	0	0	1	0	9	2	1	0	8	0	1	1	2	2	0	0	1	0	2	0
104	48	1	3	1	2	4	3	1	26	3	2	0	0	1	1	1	1	4	1	2	1	0	0	0	1	1	0	0	0	0	0	2	1	15	1	1	3	11	1	1	1	1	2	1	2	1	2	2	1
105	44	1	1	1	9	4	3	1	19	4	2	0	0	1	1	0		4	1	3	1	0	0	0	1	1	0	0	0	0	0	2	1	34	0	3	6	25	3	3	4	4	2	3	3	3	4	4	1
106	56	1	3	1	4	1	3	2	32	4	2	0	0	1	1	1	2	4	3	3	2	0	0	0	1	1	0	0	0	0	0	3	1	21	1	2	3	16	2	2	3	3	1	1	1	2	2	3	1
107	49	1	1	1	5	1	4	1	23	4	1	0	0	1	1	0		4	1	1	1	0	0	0	2	0	0	0	0	0	0	1	0	30	0	3	5	22	3	3	3	3	2	2	2	3	3	3	3
108	56	1	1	1	7	1	4	1	27	4	1	0	0	1	1	0		4	2	2	1	0	0	0	2	0	0	0	0	0	0	1	0	19	1	2	3	14	2	2	1	2	1	1	1	2	2	3	2
109	51	1	3	1	2	4	2	1	24	3	2	0	0	0	1	0		4	1	2	1	0	0	0	1	1	0	0	0	0	0	1	0	7	2	0	1	6	1	0	0	1	1	1	0	1	2	0	0
110	55	1	2	1	4	4	4	2	32	4	2	0	0	0	2	1	2	4	1	1	1	0	0	0	1	0	0	0	0	0	0	1	0	26	0	3	2	21	1	3	3	3	3	0	1	4	4	3	1
111	65	1	3	1	4	4	3	3	33	3	2	0	0	0	1	1	2	4	2	1	1	0	0	1	2	0	0	0	0	0	0	1	1	27	0	2	4	21	2	2	2	3	3	2	2	2	3	3	3
112	62	1	1	1	7	1	4	1	37	4	1	0	0	1	4	0		4	1	2	1	0	0	1	2	0	0	0	0	0	0	1	1	36	0	3	6	27	3	3	3	4	3	3	3	4	4	3	3
113	33	1	3	2	8	4	5	1	5	1	1	0	0	1	3	1	1	4	3	3	2	1	0	0	2	1	1	0	0	0	0	3	1	10	2	2	0	8	0	2	2	2	0	0	0	2	1	1	0
114	30	1	2	1	9	4	3	2	2	3	2	0	0	0	1	1	2	4	1	1	1	0	0	0	1	0	0	0	0	0	0	1	1	9	2	1	0	8	0	1	1	1	3	0	0	1	1	1	0
115	52	1	1	1	3	1	4	1	28	4	1	0	0	1	1	0		4	3	3	1	0	0	0	1	1	0	0	0	0	0	2	0	26	0	3	3	20	2	3	2	2	3	2	1	2	4	3	2
116	67	1	3	1	7	1	4	1	41	3	1	0	0	1	1	1	2	4	1	2	2	0	0	2	1	1	0	0	0	0	0	2	0	26	0	3	4	19	2	3	2	2	3	1	2	2	4	4	1
117	72	1	3	1	2	1	2	4	41	3	2	0	0	1	2	1	3	4	1	2	1	0	0	0	1	1	0	0	0	0	0	1	0	30	0	1	4	25	2	1	4	3	3	2	2	3	4	4	2
118	54	1	1	1	8	4	3	2	30	1	2	0	1	0	1	1	2	4	2	2	1	0	0	0	2	0	0	0	0	0	0	1	0	14	1	2	4	8	0	2	0	0	0	4	4	0	0	0	4
119	49	1	1	1	4	4	3	2	26	2	2	0	0	0	1	1	2	4	1	1	1	0	0	0	2	0	0	0	0	0	0	1	0	18	1	2	3	13	1	2	2	2	2	0	2	2	2	3	0
120	72	1	1	1	7	1	3	2	47	2	1	0	0	1	2	1	1	4	3	3	2	0	0	0	1	1	1	0	0	0	0	3	1	26	0	2	4	20	2	2	2	2	3	2	2	3	3	3	2
121	54	1	1	1	4	4	3	1	27	3	2	0	0	1	1	0		4	3	2	2	0	0	0	1	1	0	0	0	0	0	3	1	20	1	2	3	15	2	2	2	3	1	1	1	2	1	3	2
122	66	1	1	1	7	1	3	1	42	4	1	0	0	1	1	0		4	2	3	2	0	0	1	1	1	1	0	0	0	0	2	1	31	0	2	3	26	2	2	3	4	4	1	1	4	4	4	2
123	58	1	1	1	7	1	4	0		4	2	0	0	1	1	0		4	1	1	1	0	0	0	1	0	0	0	0	0	0	1	1	27	0	3	4	20	2	3	3	3	2	2	2	3	2	3	2
124	56	1	1	1	4	4	2	2	31	3	2	0	0	1	1	0		4	1	3	1	0	0	0	1	0	0	0	0	0	0	2	0	17	1	2	3	12	2	2	2	3	1	1	1	1	1	2	1
125	47	1	3	1	9	4	2	1	19	2	2	0	0	1	2	1	2	4	3	2	1	0	0	1	2	1	0	0	0	0	0	2	1	29	0	2	4	23	2	2	3	3	3	2	2	3	3	3	3
126	52	1	3	1	8	1	1	2	30	2	2	0	0	1	0	1	2	4	3	3	1	1	1	0	1	1	0	0	1	0	0	3	1	14	1	1	2	11	1	1	1	2	1	1	1	1	3	1	1
127	44	1	1	1	3	1	4	1	15	3	1	0	0	1	0	0		4	1	3	1	1	0	0	1	1	0	0	0	0	0	2	0	15	1	2	3	10	2	2	1	1	1	1	1	1	1	3	1
128	51	1	1	1	7	3	2	1	26	2	1	0	0	1	2	0		4	3	3	2	0	0	0	2	1	0	0	0	0	0	3	1	20	1	2	3	15	2	2	3	3	1	1	1	2	2	2	1
129	47	1	1	1	3	1	1	1	16	3	1	0	0	1	1	0		3	1	2	1	0	0	0	0	1	0	0	0	0	0	2	1	21	1	1	4	16	2	1	2	2	1	2	2	3	2	2	2
130	57	1	3	1	7	1	3	2	26	3	2	0	0	1	1	1	2	4	2	2	2	0	0	0	1	1	1	0	0	0	0	3	1	20	1	1	3	16	2	1	2	3	1	1	1	2	3	2	2
131	40	1	1	1	4	1	4	2	13	4	2	0	1	0	1	1	1	4	1	1	1	0	0	0	1	0	0	0	0	0	0	1	0	18	1	2	2	14	1	2	1	2	3	2	1	2	2	1	1
132	49	1	1	1	3	1	3	1	32	3	1	0	0	1	4	0		4	1	3	1	1	0	0	1	1	0	0	0	0	0	1	0	22	1	2	3	17	2	2	2	3	3	2	1	2	1	3	1
133	35	1	3	1	9	4	5	2	5	3	2	0	1	1	3	1	2	4	2	4	3	1	0	0	2	1	0	0	1	0	0	4	1	16	1	1	4	11	2	1	1	3	0	1	2	2	1	2	1
134	49	1	3	1	3	1	6	1	26	4	1	0	0	1	1	1	2	4	2	3	3	1	0	1	2	1	1	0	0	0	0	3	1	24	1	3	4	17	2	3	2	3	1	2	2	2	3	3	1
135	37	1	3	1	9	4	3	1	14	3	2	0	0	1	1	1	3	4	3	3	4	0	1	0	1	1	0	0	1	0	0	4	1	7	2	0	2	5	1	0	1	1	0	0	1	0	1	1	1
136	28	1	1	1	9	4	5	1	6	4	2	0	0	1	1	1	1	4	1	1	1	0	0	0	1	0	0	0	0	0	0	1	1	10	2	1	2	7	1	1	1	1	1	1	1	1	0	1	1
137	66	1	1	1	7	1	3	2	34	3	1	0	0	1	2	0		4	1	1	1	0	0	1	1	0	0	0	0	0	0	1	0	24	1	3	4	17	2	3	3	3	1	1	2	2	3	3	1
138	63	1	1	1	7	1	1	3	30	3	2	0	0	0	2	0		4	1	1	1	0	0	0	1	0	0	0	0	0	0	1	1	18	1	1	3	14	2	1	2	3	1	1	1	1	2	3	1
139	74	1	1	1	7	1	6	2	48	4	1	0	0	1	2	0		4	1	1	1	0	0	1	1	1	0	0	0	0	0	2	1	31	0	2	5	24	2	2	2	3	4	2	3	3	4	3	3
140	59	1	3	1	3	1	1	2	32	3	2	0	0	1	1	0		4	2	1	1	0	0	1	2	1	0	0	0	0	0	1	1	11	2	1	2	8	1	1	1	1	1	1	1	1	1	1	1
141	54	1	1	1	5	1	6	1	29	4	1	0	0	1	1	1	2	4	2	2	1	0	0	1	2	0	0	0	0	0	0	1	1	23	1	2	5	16	3	2	2	3	2	1	2	2	2	3	1
142	75	1	2	1	7	1	1	4	46	3	2	0	0	0	2	1	2	4	1	2	1	0	0	1	1	0	0	0	0	0	0	1	1	27	0	2	4	21	2	2	2	3	3	2	2	2	4	3	2
143	58	1	1	1	7	1	3	2	35	4	2	0	0	1	1	1	2	4	1	1	1	0	0	0	2	0	0	0	0	0	0	1	1	19	1	2	4	13	2	2	1	2	2	1	2	1	3	2	1
144	70	1	1	1	7	1	2	1	42	3	2	0	0	1	2	0		4	3	2	1	0	0	1	2	1	0	0	0	0	0	3	1	35	0	2	6	27	3	2	4	3	4	3	3	3	4	3	3
145	50	1	3	1	9	4	4	2	23	2	2	0	0	0	1	1	2	4	2	3	1	1	0	1	2	1	1	0	0	0	0	2	1	7	2	1	2	4	1	1	0	1	0	0	1	1	0	1	1
146	48	1	1	1	3	1	1	1	26	3	1	0	1	1	1	0		4	3	1	2	0	0	0	2	1	0	0	0	0	0	3	1	10	2	1	3	6	2	1	0	1	1	1	1	1	0	1	1
147	66	1	3	1	7	1	2	2	37	3	2	0	1	0	2	1	1	4	1	1	1	0	0	2	1	1	0	0	0	0	0	2	1	17	1	1	4	12	2	1	1	2	1	1	2	2	3	1	1
148	43	1	3	1	5	1	2	1	19	3	2	0	0	1	1	1	1	4	1	3	1	1	0	0	1	0	0	0	0	0	0	1	0	13	2	1	3	9	1	1	1	1	0	1	2	1	1	3	1
149	33	1	1	1	5	1	6	1	1	4	1	0	0	1	1	0		4	1	1	1	0	0	0	2	0	0	0	0	0	0	1	0	12	2	1	3	8	2	1	1	2	0	1	1	1	1	1	1
150	55	1	1	1	7	1	3	1	33	3	2	0	0	1	1	1	2	4	3	3	1	0	1	0	2	1	0	0	0	0	0	4	1	24	1	2	6	16	3	2	2	3	3	2	3	2	1	2	1
151	45	1	3	1	4	4	3	1	24	4	2	0	0	1	1	1	2	4	1	3	1	0	0	0	1	1	0	0	0	0	0	2	1	17	1	2	3	12	2	2	1	1	1	1	1	2	2	3	1
152	46	1	3	1	4	4	3	0		4	2	0	0	1	1	1	1	4	2	1	1	0	0	1	2	0	0	0	0	0	0	1	0	29	0	3	5	21	3	3	3	3	2	2	2	3	2	3	3
153	51	1	1	1	5	1	5	1	26	4	1	0	0	1	1	0		4	3	2	1	0	0	0	2	0	0	0	0	0	0	1	0	27	0	2	5	20	3	2	3	3	2	2	2	3	2	3	2
154	33	1	1	1	5	1	5	1	7	4	1	0	0	1	1	1	1	4	3	3	1	1	0	0	1	0	0	0	0	0	0	1	0	10	2	2	4	4	2	2	0	0	0	1	2	0	0	2	1
155	68	1	1	1	7	1	6	1	41	4	1	0	0	1	1	0		4	3	3	2	0	0	0	2	1	0	1	0	1	0	3	1	35	0	3	6	26	3	3	3	3	3	3	3	3	4	4	3
156	51	1	3	1	4	1	3	2	24	4	2	0	0	1	1	1	1	4	2	1	1	0	0	1	2	0	0	0	0	0	0	1	0	24	1	3	4	17	2	3	1	3	2	2	2	2	2	3	2
157	33	1	1	1	5	1	6	1	4	4	1	0	0	1	1	0		4	3	2	1	0	0	0	2	0	0	0	0	0	0	1	0	14	1	1	4	9	2	1	1	1	1	1	2	1	1	2	1
158	62	1	1	1	7	1	4	1	37	4	1	0	0	1	1	1	2	4	2	1	1	0	0	2	2	0	0	0	0	0	0	1	1	29	0	3	5	21	3	3	2	3	3	2	2	3	3	3	2
159	49	1	1	1	5	1	3	1	21	4	1	0	0	1	1	0		4	1	2	2	0	0	0	2	1	0	0	0	0	0	3	1	24	1	3	4	17	2	3	2	1	2	2	2	2	3	3	2
160	75	1	1	1	7	1	2	2	49	4	1	0	0	1	2	0		4	1	2	1	0	0	1	1	0	0	0	0	0	0	1	1	29	0	2	5	22	3	2	2	2	4	2	2	3	4	3	2
161	68	1	1	1	7	1	3	2	42	3	1	0	0	1	2	0		4	3	3	2	0	0	0	2	1	0	0	0	0	0	3	1	22	1	2	3	17	2	2	2	3	1	1	1	2	3	3	2
162	66	1	1	1	7	1	4	1	34	4	2	0	0	1	1	0		4	1	1	1	0	0	0	1	0	0	0	0	0	0	1	1	13	2	1	3	9	2	1	1	1	1	1	1	1	1	2	1
163	58	1	1	1	7	1	2	2	32	3	2	0	0	1	2	0		4	1	2	1	0	0	1	1	0	0	0	0	0	0	1	0	18	1	1	3	14	2	1	1	3	1	1	1	1	2	3	2
164	36	1	1	1	5	1	6	1	8	4	1	0	0	1	1	0		4	1	1	1	0	0	0	2	0	0	0	0	0	0	1	0	26	0	3	5	18	3	3	3	3	1	2	2	2	1	3	3
165	56	1	3	1	4	4	3	2	24	4	2	0	0	1	1	1	2	4	1	1	1	0	0	1	1	0	0	0	0	0	0	1	0	16	1	2	3	11	2	2	1	3	0	1	1	1	1	3	1
166	62	1	3	1	2	1	2	4	47	2	2	0	0	0	2	1	2	4	1	2	1	0	0	2	2	0	0	0	0	0	0	1	1	18	1	1	4	13	2	1	1	1	1	1	2	1	4	3	1
167	27	1	1	2	5	1	5	0		4	1	0	0	1	4	1	2	4	1	1	1	0	0	0	1	1	0	0	0	0	0	1	0	6	2	1	2	3	1	1	0	0	0	1	1	0	0	1	1
168	57	1	1	1	7	1	3	1	32	3	2	0	0	1	1	1	2	4	1	2	1	0	0	0	1	0	0	0	0	0	0	1	0	30	0	3	4	23	2	3	3	3	3	2	2	3	4	3	2
169	59	1	1	1	5	1	4	1	34	4	1	0	0	1	1	0		4	2	2	1	0	0	0	1	0	0	0	0	0	0	1	1	27	0	3	5	19	3	3	2	3	1	2	2	3	3	3	2
170	39	1	1	1	5	4	6	1	13	4	1	0	0	1	1	0		4	3	3	3	0	0	0	1	1	0	0	0	0	0	4	1	6	2	0	3	3	2	0	0	0	0	1	1	0	0	1	1
171	61	1	3	1	4	1	1	1	40	3	2	0	0	1	1	0		4	1	1	1	0	0	1	2	0	0	0	0	0	0	1	0	23	1	1	4	18	2	1	2	2	2	2	2	2	3	3	2
172	51	1	1	1	5	1	5	1	24	4	1	0	0	1	1	0		4	3	2	1	0	0	1	2	0	0	0	0	0	0	1	0	31	0	3	5	23	3	3	3	3	3	2	2	3	2	4	3
173	44	1	1	1	4	1	5	1	21	4	2	0	0	1	1	1	2	4	1	1	1	0	0	0	1	0	0	0	0	0	0	1	1	30	0	3	6	21	3	3	2	2	3	3	3	3	2	3	3
174	58	1	1	1	7	1	2	1	32	4	2	0	0	1	1	0		4	2	2	1	0	0	1	2	0	0	0	0	0	0	1	0	31	0	2	5	24	3	2	3	3	3	3	2	3	3	3	3
175	30	1	3	1	8	1	2	2	1	3	2	0	0	1	1	1	2	4	1	1	1	0	0	0	1	0	0	0	0	0	0	1	1	11	2	1	2	8	1	1	1	1	1	1	1	1	1	1	1
176	48	1	2	1	5	1	3	1	25	3	2	0	0	1	1	1	2	4	1	1	1	0	0	0	2	0	0	0	0	0	0	1	1	21	1	2	3	16	2	2	2	3	2	1	1	1	2	3	2
177	59	1	1	1	7	1	4	0		4	1	0	0	1	1	0		4	1	1	2	0	0	0	1	1	1	0	0	0	0	2	1	32	0	3	5	24	3	3	3	3	3	2	2	3	4	3	3
178	59	1	3	1	4	4	1	2	32	3	2	0	0	1	1	0		4	2	1	1	0	0	1	2	0	0	0	0	0	0	2	0	15	1	1	3	11	2	1	1	2	2	1	1	1	1	2	1
179	51	1	1	1	5	1	5	1	26	4	1	0	0	1	1	0		4	3	2	1	0	0	0	2	0	0	0	0	0	0	1	1	30	0	3	6	21	3	3	3	3	3	2	3	3	2	3	2
180	34	1	1	1	4	1	5	1	5	4	2	0	0	1	1	0		4	1	1	1	0	0	0	2	0	0	0	0	0	0	1	1	15	1	3	4	8	2	3	0	1	1	1	2	1	0	3	1
181	60	1	3	1	7	1	5	1	37	4	2	0	0	1	1	0		4	3	3	1	0	0	1	2	0	0	0	0	0	0	1	0	32	0	3	6	23	3	3	3	3	3	3	3	3	3	3	2
182	72	1	1	1	7	1	2	1	34	4	1	0	0	1	1	0		4	2	2	1	0	0	1	2	0	0	0	0	0	0	1	1	33	0	3	6	24	3	3	3	3	3	2	3	3	4	3	3
183	44	1	1	1	4	4	4	1	14	4	2	0	0	1	1	0		4	1	1	1	0	0	0	2	0	0	0	0	0	0	1	1	18	1	2	4	12	2	2	1	1	1	2	2	1	1	3	2
184	52	1	1	1	5	1	5	1	25	4	1	0	0	1	1	0		4	3	3	1	0	0	0	2	1	0	0	0	0	0	2	1	21	1	2	5	14	3	2	1	2	2	1	2	2	1	3	2
185	32	1	1	1	5	1	6	1	7	4	1	0	0	1	3	0		4	1	2	1	0	0	0	1	0	0	0	0	0	0	1	0	20	1	2	4	14	2	2	1	2	2	2	2	1	1	3	2
186	61	1	1	1	7	1	5	1	39	4	1	0	0	1	1	1	2	4	1	1	1	0	0	1	2	0	0	0	0	0	0	1	0	30	0	3	5	22	3	3	2	3	3	2	2	3	3	3	3
187	62	1	1	1	7	1	4	2	30	3	1	0	0	1	1	0		4	2	2	1	0	0	0	2	0	0	0	0	0	0	1	0	29	0	3	5	21	3	3	2	2	3	2	2	3	3	3	3
188	67	1	3	1	4	4	4	2	39	3	2	0	0	0	1	1	2	4	2	1	1	0	0	2	2	0	0	0	0	0	0	1	0	27	0	3	4	20	2	3	2	3	2	2	2	2	3	3	3
189	37	1	1	1	5	1	5	2	6	4	1	0	0	1	4	0		4	1	1	3	0	0	0	2	0	0	0	0	0	0	1	0	23	1	3	3	17	2	3	2	2	2	2	1	2	1	3	3
190	33	1	3	1	5	1	6	0		4	1	0	0	1	1	0		4	3	2	1	0	0	0	1	0	0	0	0	0	0	1	0	18	1	3	4	11	2	3	1	1	1	1	2	1	1	3	2
191	59	1	1	1	5	1	3	1	24	4	1	0	0	1	1	0		4	1	1	1	0	0	0	2	1	0	0	0	0	0	2	1	31	0	4	4	23	2	4	3	3	3	3	2	3	2	3	3
192	60	1	3	1	2	4	1	3	34	2	2	0	0	0	1	1	2	4	1	1	1	0	0	1	2	0	0	0	0	0	0	1	1	21	1	2	4	15	2	2	1	2	2	2	2	1	2	3	2
193	47	1	3	1	8	1	3	1	21	3	2	0	0	1	1	1	2	4	1	1	1	0	0	0	2	0	0	0	0	0	0	1	0	23	1	3	4	16	2	3	2	2	2	1	2	2	2	3	2
194	58	1	1	1	5	4	4	1	31	4	1	0	0	1	1	0		4	2	1	2	0	0	0	2	1	0	0	0	0	0	2	1	28	0	2	5	21	3	2	2	2	3	2	2	3	3	3	3
195	59	1	1	1	3	4	4	1	36	3	1	0	0	1	1	0		4	2	3	1	0	0	0	1	1	0	0	0	0	0	2	1	24	1	2	4	18	2	2	2	3	3	2	2	2	1	3	2
196	57	1	3	1	3	4	2	1	29	3	2	0	0	1	1	1	2	4	1	2	2	0	0	0	1	1	0	0	0	0	0	3	1	17	1	1	4	12	2	1	1	1	2	2	2	1	1	2	2
197	64	1	2	1	7	1	3	2	32	3	2	0	0	1	1	1	2	4	2	3	1	0	0	1	2	1	0	0	0	0	0	2	1	20	1	1	4	15	2	1	1	1	1	2	2	2	3	3	2
198	48	1	3	1	4	1	2	1	25	3	2	0	0	1	1	0		4	2	2	1	0	0	1	2	0	0	0	0	0	0	1	0	22	1	3	4	15	2	3	2	2	2	2	2	1	1	3	2
199	54	1	1	1	5	1	3	3	30	3	2	0	0	1	1	0		4	2	1	1	0	0	0	2	0	0	0	0	0	0	1	1	26	0	3	4	19	2	3	2	2	2	2	2	3	2	3	3
200	34	1	1	1	5	1	6	1	6	4	1	0	0	1	1	1	2	4	1	1	1	0	0	0	2	0	0	0	0	0	0	1	1	17	1	2	4	11	2	2	1	1	1	2	2	1	0	3	2
201	58	1	3	1	8	4	1	3	31	3	2	0	0	0	1	1	1	4	1	1	1	0	0	0	1	0	0	0	0	0	0	1	1	22	1	2	4	16	2	2	1	2	1	2	2	2	3	3	2
202	69	1	1	1	7	1	3	1	38	3	1	0	0	1	1	0		4	1	1	2	0	0	1	2	1	1	0	0	0	0	2	1	25	1	3	4	18	2	3	2	2	3	2	2	3	3	2	1
203	56	1	1	1	4	1	2	1	34	3	2	0	0	1	1	0		4	3	1	1	0	0	1	2	1	0	0	0	0	0	2	1	20	1	2	4	14	2	2	1	1	2	2	2	2	2	2	2
204	61	2	1	1	4	1	2	1	40	3	2	0	0	1	1	0		4	1	3	3	0	0	1	1	1	1	0	0	0	0	3	1	19	1	0	4	15	2	0	2	2	2	1	2	2	2	2	2
205	57	1	1	1	3	4	1	1	34	2	2	0	0	1	1	0		4	1	1	1	0	0	1	2	1	0	0	0	0	0	2	1	19	1	1	4	14	2	1	1	1	1	2	2	2	2	2	3
206	69	1	1	1	7	1	3	0		3	1	0	0	1	1	0		4	1	1	1	0	0	2	1	1	0	0	0	0	0	2	1	29	0	3	4	22	2	3	3	3	3	2	2	3	3	3	2
207	42	1	1	1	4	4	6	0		4	1	0	0	1	1	0		4	2	1	1	0	0	0	2	1	0	0	0	0	0	2	0	18	1	1	4	13	2	1	2	2	1	2	2	1	1	2	2
208	66	1	1	1	3	4	1	2	42	3	2	0	0	1	1	0		4	1	2	1	0	0	0	1	0	0	0	0	0	0	1	0	25	1	2	4	19	2	2	2	2	2	2	2	3	3	3	2
209	56	1	1	1	5	4	4	1	33	4	1	0	0	1	1	0		4	2	3	2	0	0	0	2	1	1	0	0	0	0	3	1	20	1	1	5	14	3	1	1	2	2	2	2	1	2	2	2
210	35	1	3	1	9	4	4	2	8	4	2	0	0	1	1	1	2	4	2	4	4	0	1	1	2	1	0	0	0	0	0	4	1	12	2	0	4	8	2	0	0	1	1	1	2	1	1	1	2
211	37	1	1	1	5	1	3	1	8	4	1	0	0	1	1	0		4	1	1	1	0	0	0	2	0	0	0	0	0	0	1	1	21	1	2	4	15	2	2	1	2	2	2	2	2	1	3	2
212	74	1	2	1	7	1	5	2	48	3	1	0	0	1	2	0		4	1	1	1	0	0	1	1	0	0	0	0	0	0	1	1	30	0	3	4	23	2	3	3	3	3	2	2	3	4	3	2
213	60	1	1	1	7	1	3	2	36	4	1	0	0	1	1	1	3	4	3	2	1	0	0	0	2	1	0	0	0	0	0	2	1	25	1	2	5	18	3	2	2	2	1	2	2	2	4	3	2
214	43	1	3	1	3	4	3	1	19	4	2	0	0	1	1	1	1	4	1	3	2	0	0	0	1	1	0	0	0	0	0	2	0	18	1	1	4	13	2	1	1	2	2	2	2	1	1	2	2
215	56	1	3	1	2	4	3	2	23	3	2	0	0	1	1	1	2	4	3	3	1	0	0	0	1	1	0	0	0	0	0	2	1	16	1	1	4	11	2	1	1	1	1	2	2	1	1	2	2
216	61	2	1	1	7	1	5	1	40	4	1	0	0	1	1	0		4	1	3	2	0	0	1	1	1	1	0	0	0	0	3	1	26	0	2	5	19	3	2	2	2	3	2	2	3	3	2	2
217	52	2	2	1	4	1	3	1	23	4	2	0	0	1	1	1	2	4	3	1	1	0	0	0	2	1	0	0	0	0	0	2	0	19	1	2	4	13	2	2	1	2	1	2	2	2	1	2	2
218	62	1	3	1	7	1	1	2	38	3	2	0	0	0	1	1	2	3	3	3	3	0	0	0	1	1	0	0	0	0	0	4	1	14	1	0	4	10	2	0	1	0	1	2	2	1	2	1	2
219	66	1	1	1	7	1	3	1	42	4	1	0	0	1	1	0		4	2	3	2	0	0	1	1	1	1	0	0	0	0	2	1	22	1	1	4	17	2	1	2	1	2	2	2	1	4	3	2
220	70	1	1	1	7	1	2	1	42	3	1	0	0	1	2	0		4	3	2	1	0	0	1	2	1	0	0	0	0	0	2	1	24	1	2	5	17	3	2	2	2	3	2	2	2	2	2	2
221	52	1	1	1	4	4	3	2	27	3	2	0	0	1	1	1	2	4	3	1	1	0	0	0	2	1	0	0	0	0	0	2	0	19	1	1	4	14	2	1	1	1	1	2	2	2	2	2	3
222	56	1	1	1	5	1	3	1	33	4	1	0	0	1	1	0		4	2	3	2	0	0	0	2	1	1	0	0	0	0	3	1	21	1	1	4	16	2	1	1	2	2	2	2	2	1	3	3
223	42	1	1	1	4	4	3	1	24	4	1	0	0	1	4	1	1	4	1	3	1	0	0	1	1	1	0	0	0	0	0	1	0	20	1	3	3	14	1	3	2	2	1	2	2	2	1	2	2
224	56	1	3	1	5	1	3	1	30	4	2	0	0	1	2	0		4	1	1	1	0	0	0	1	0	0	0	0	0	0	1	0	28	0	3	4	21	2	3	2	3	2	3	2	3	3	3	2
225	56	1	3	1	2	4	1	2	32	3	2	0	0	0	1	1	2	4	1	1	1	0	0	0	2	0	0	0	0	0	0	1	0	22	1	2	4	16	2	2	2	3	1	2	2	2	1	3	2
226	54	1	1	1	9	4	2	1	31	3	2	0	0	1	4	0		4	1	3	1	0	0	1	1	1	0	0	0	0	0	2	1	14	1	1	3	10	2	1	1	2	1	1	1	1	1	2	1
227	56	1	3	1	4	4	3	2	32	3	2	0	0	1	1	1	2	4	3	3	1	0	0	0	1	1	0	0	0	0	0	2	0	19	1	1	4	14	2	1	1	2	2	2	2	2	1	2	2
228	42	1	1	1	9	4	6	0		4	1	0	0	1	1	0		4	2	1	1	0	0	1	2	1	0	0	0	0	0	2	0	19	1	2	4	13	2	2	1	2	1	2	2	2	1	2	2
229	57	1	1	1	5	1	4	1	31	4	1	0	0	1	1	0		4	2	1	1	0	0	0	2	1	0	0	0	0	0	2	0	23	1	2	4	17	2	2	2	3	3	2	2	2	1	2	2
230	44	1	1	1	9	4	3	1	19	4	2	0	0	1	1	0		4	1	3	1	0	0	0	1	1	0	0	0	0	0	2	0	15	1	1	4	10	2	1	1	1	1	2	2	1	0	2	2
231	47	1	2	1	9	4	4	1	24	4	1	0	0	1	1	1	2	4	3	2	1	0	0	0	2	1	0	0	0	0	0	3	1	17	1	1	4	12	2	1	1	1	1	2	2	1	1	2	3
232	47	1	2	1	5	1	4	1	22	4	1	0	0	1	1	1	2	4	1	1	1	0	0	0	2	1	0	0	0	0	0	2	0	19	1	2	4	13	2	2	1	2	2	2	2	1	1	2	2
233	61	1	3	1	4	4	1	1	38	3	2	0	0	1	1	0		4	1	1	1	0	0	0	2	1	0	0	0	0	0	2	0	23	1	2	4	17	2	2	2	3	2	2	2	2	1	3	2
234	44	1	1	1	5	1	6	2	11	4	1	0	0	1	1	0		4	1	1	1	0	0	0	2	0	0	0	0	0	0	1	0	26	0	3	4	19	2	3	2	3	3	2	2	2	2	3	2
235	54	1	1	1	7	1	4	1	32	4	1	0	0	1	1	0		4	3	3	1	0	0	1	2	0	0	0	0	0	0	1	1	24	1	3	5	16	3	3	2	2	2	2	2	2	1	3	2
236	49	1	1	1	5	1	4	1	25	4	1	0	0	1	1	0		4	2	2	1	0	0	2	2	0	0	0	0	0	0	1	1	25	1	3	4	18	2	3	2	3	2	2	2	3	2	2	2
237	52	1	3	1	3	1	3	1	26	4	1	0	0	1	1	0		4	1	1	1	0	0	1	2	0	0	0	0	0	0	1	0	26	0	3	4	19	2	3	2	2	2	2	2	3	3	2	3
238	40	1	1	1	5	1	6	2	10	4	1	0	0	1	4	0		4	1	1	1	0	0	0	2	0	0	0	0	0	0	1	0	21	1	3	4	14	2	3	1	2	1	1	2	2	1	3	3
239	55	1	1	1	5	1	3	1	32	4	1	0	0	1	1	0		4	2	1	1	0	0	1	2	0	0	0	0	0	0	1	0	30	0	3	5	22	3	3	3	3	3	2	2	3	3	3	2
240	58	1	1	1	4	4	3	3	36	3	2	0	0	1	1	1	3	4	2	1	3	0	0	0	2	0	0	0	0	0	0	1	1	29	0	3	3	23	2	3	3	3	3	2	1	3	2	4	3
241	37	1	1	1	5	1	6	1	8	4	1	0	0	1	1	0		4	1	1	1	0	0	0	2	0	0	0	0	0	0	1	0	23	1	3	4	16	2	3	1	2	1	2	2	2	2	3	3
242	59	1	3	1	2	4	3	2	32	3	2	0	0	1	1	1	1	4	2	1	1	0	0	0	1	0	0	0	0	0	0	1	0	21	1	2	4	15	2	2	1	2	1	2	2	2	2	3	2
243	67	1	1	1	7	1	1	2	40	4	2	0	0	1	1	0		4	2	1	2	0	0	1	2	1	1	0	0	0	0	2	1	20	1	3	4	13	2	3	1	2	1	2	2	2	2	2	1
244	49	1	1	1	5	1	3	1	32	4	1	0	0	1	1	0		4	1	3	2	1	0	0	1	1	1	0	0	0	0	3	1	15	1	1	4	10	2	1	1	1	1	2	2	1	1	1	2
245	56	1	3	1	4	1	2	1	29	4	2	0	0	1	1	1	2	4	1	2	1	0	0	0	1	1	0	0	0	0	0	2	0	26	0	3	5	18	3	3	2	2	3	2	2	2	2	3	2
246	54	1	3	1	3	1	3	2	31	3	2	0	0	1	1	0		4	2	3	1	0	0	0	2	0	0	0	0	0	0	1	1	19	1	2	4	13	2	2	1	2	1	2	2	2	1	2	2
247	66	1	3	1	7	1	1	1	40	3	2	0	0	1	1	0		4	1	1	1	0	0	1	1	0	0	0	0	0	0	1	1	20	1	2	4	14	2	2	1	2	1	2	2	2	2	2	2
248	62	1	3	1	2	1	1	1	38	4	2	0	0	1	1	1	2	4	3	3	1	0	0	0	1	1	0	0	0	0	1	4	1	14	1	0	4	10	2	0	1	1	1	2	2	1	1	1	2
249	32	1	1	1	5	1	5	1	5	4	1	0	0	1	1	0		4	3	3	1	0	0	0	2	1	0	0	0	0	0	1	0	12	2	1	4	7	2	1	0	0	0	2	2	1	0	2	2
250	37	1	1	1	4	1	3	1	12	4	2	0	0	1	1	0		4	1	3	1	0	0	0	1	0	0	0	0	0	0	1	0	18	1	2	4	12	2	2	1	2	1	2	2	1	1	2	2
251	51	1	1	1	4	1	2	2	25	3	2	0	0	1	1	0		4	2	1	1	0	0	0	2	0	0	0	0	0	0	1	0	21	1	2	4	15	2	2	2	2	2	2	2	1	2	3	1
252	47	1	1	1	5	1	6	2	17	4	1	0	0	1	1	1	1	4	3	1	1	0	0	1	2	1	0	0	0	0	0	2	0	15	1	1	4	10	2	1	1	1	1	2	2	1	1	1	2
253	41	1	3	1	3	1	4	2	10	4	2	0	0	1	1	1	2	4	1	1	1	0	0	0	2	0	0	0	0	0	0	1	0	22	1	2	4	16	2	2	2	3	2	2	2	2	1	2	2
254	51	1	1	1	5	1	6	1	23	4	1	0	0	1	1	0		4	1	1	1	0	0	0	1	0	0	0	0	0	0	1	1	27	0	3	5	19	3	3	3	3	2	2	2	2	2	3	2
255	61	1	3	1	4	1	1	1	39	3	2	0	0	1	1	0		4	1	1	1	0	0	0	2	1	0	0	0	0	0	2	0	21	1	2	4	15	2	2	2	2	1	2	2	2	1	3	2
256	56	1	1	1	4	1	3	1	34	4	2	0	0	1	2	0		4	3	1	1	0	0	0	2	1	0	0	0	0	0	2	0	21	1	3	4	14	2	3	2	2	1	2	2	2	1	2	2
257	57	1	1	1	5	1	1	1	31	4	1	0	0	1	1	0		4	1	1	1	0	0	1	2	1	0	0	0	0	0	2	0	25	1	3	4	18	2	3	3	2	2	2	2	2	2	3	2
258	70	1	1	1	7	1	2	1	42	4	1	0	0	1	2	0		4	3	2	1	0	0	1	2	1	0	0	0	0	0	2	0	24	1	2	4	18	2	2	2	2	3	2	2	2	3	2	2
259	49	1	1	1	3	1	2	1	23	4	1	0	0	1	2	0		4	2	3	3	0	0	0	2	1	1	0	0	0	0	3	1	16	1	1	4	11	2	1	1	1	1	2	2	1	1	2	2
260	44	1	3	1	4	4	3	1	23	3	2	0	0	1	1	1	2	4	3	1	2	0	0	0	1	1	0	0	0	0	0	3	1	16	1	1	4	11	2	1	1	1	1	2	2	2	1	1	2
261	58	1	3	1	4	1	3	2	32	3	2	0	0	1	1	1	2	4	2	2	1	0	0	0	2	0	0	0	0	0	0	1	0	22	1	2	4	16	2	2	2	2	2	2	2	3	1	2	2
262	58	1	1	1	7	1	3	1	37	3	2	0	0	1	1	0		4	1	2	1	0	0	0	2	1	0	0	0	0	0	1	0	28	0	3	4	21	2	3	3	2	2	2	2	3	3	3	3
263	53	1	3	1	3	1	3	2	29	3	2	0	0	1	1	1	2	4	3	1	1	0	0	0	2	1	0	0	0	0	0	2	0	18	1	1	4	13	2	1	1	2	2	2	2	2	1	2	1
264	52	1	3	1	4	4	3	1	27	4	2	0	0	1	1	1	2	4	3	1	1	0	0	0	1	1	0	0	0	0	0	1	1	20	1	2	4	14	2	2	1	1	1	2	2	2	2	3	2
265	50	1	1	1	3	1	3	1	24	4	1	0	0	1	1	0		4	1	1	1	0	0	0	2	0	0	0	0	0	0	1	0	30	0	3	5	22	3	3	3	3	3	2	2	3	3	3	2
266	59	1	2	1	7	1	4	2	36	3	2	0	0	1	1	1	3	4	3	2	1	0	0	0	2	1	0	0	0	0	0	2	0	18	1	2	4	12	2	2	1	2	1	2	2	1	1	2	2
267	54	1	1	1	4	1	3	3	18	4	1	0	0	1	1	0		4	2	1	1	0	0	0	2	0	0	0	0	0	0	1	0	30	0	3	5	22	3	3	2	2	3	2	2	3	3	4	3
268	30	1	1	1	5	1	3	2	8	4	1	0	0	1	1	0		4	1	1	1	0	0	0	1	0	0	0	0	0	0	2	0	23	1	3	4	16	2	3	1	2	3	2	2	2	1	3	2
269	59	1	3	1	2	1	3	5	27	3	2	0	0	1	1	1	1	4	2	1	1	0	0	1	2	0	0	0	0	0	0	1	1	28	0	3	4	21	2	3	2	3	3	2	2	3	3	3	2
270	44	1	3	1	5	1	5	2	17	4	2	0	0	1	1	1	2	4	3	3	1	0	0	0	2	1	0	0	0	0	0	2	0	20	1	2	4	14	2	2	1	2	2	2	2	2	1	2	2
271	41	1	1	1	5	1	6	2	5	4	1	0	0	1	1	0		4	1	1	1	0	0	0	1	0	0	0	0	0	0	1	0	32	0	3	5	24	3	3	3	3	3	2	2	3	3	4	3
272	59	1	1	1	4	1	1	2	32	3	2	0	0	1	1	0		4	2	2	1	0	0	0	2	0	0	0	0	0	0	1	1	29	0	3	4	22	2	3	2	3	2	2	2	3	3	4	3
273	57	1	1	1	5	1	4	1	32	4	1	0	0	1	1	0		4	1	1	2	0	0	0	1	1	1	0	0	0	0	4	1	16	1	1	4	11	2	1	1	1	1	2	2	1	1	2	2
274	72	1	1	1	7	1	2	1	47	3	1	0	0	1	2	0		4	3	2	1	0	0	1	2	0	0	0	0	0	0	1	1	33	0	3	4	26	2	3	3	3	4	3	2	3	4	4	2
275	44	1	1	1	5	1	6	2	11	4	1	0	0	1	1	0		4	1	1	1	0	0	0	2	0	0	0	0	0	0	1	1	25	1	3	4	18	2	3	1	2	2	2	2	3	2	4	2
276	54	1	3	1	3	1	2	1	28	4	2	0	0	1	1	0		4	3	2	1	1	0	1	2	0	0	0	0	0	0	1	1	22	1	3	4	15	2	3	1	2	1	2	2	3	1	3	2
277	59	1	3	1	7	1	3	1	35	3	2	0	0	1	1	0		4	1	1	1	0	0	0	2	1	0	0	0	0	0	1	1	28	0	3	4	21	2	3	2	2	3	2	2	3	3	3	3
278	55	1	1	1	7	1	6	1	27	4	1	0	0	1	1	0		4	3	2	1	0	0	0	2	0	0	0	0	0	0	1	0	27	0	3	5	19	3	3	1	2	2	2	2	3	3	3	3
279	64	1	2	1	7	1	3	2	32	3	2	0	0	1	1	1	2	4	2	2	1	0	0	1	2	0	0	0	0	0	0	1	1	30	0	3	4	23	2	3	3	3	3	2	2	3	4	3	2
280	66	1	2	1	7	1	1	1	40	3	2	0	0	1	1	1	1	4	1	1	1	0	0	1	1	0	0	0	0	0	0	1	1	27	0	3	4	20	2	3	2	2	2	2	2	3	4	3	2
281	40	1	3	1	4	4	3	2	9	3	2	0	0	1	1	1	2	4	1	1	2	0	0	0	2	0	0	0	0	0	0	1	1	18	1	2	4	12	2	2	1	1	1	1	2	2	1	3	2

[truncated: 32 more columns]
